# Supplementary material
Source: PubMed Central journal article supplement (PMC3349014)
Supplement: NIHMS372939-supplement-1_si_001.pdf [file NIHMS372939-supplement-1_si_001.pdf]

# **Pharmacokinetics of Py-Im Polyamides Depend on Architecture: Cyclic versus Linear**

**Jevgenij A. Raskatov, Amanda E. Hargrove, Alex Y. So, and Peter B. Dervan**

## ***SUPPORTING INFORMATION***

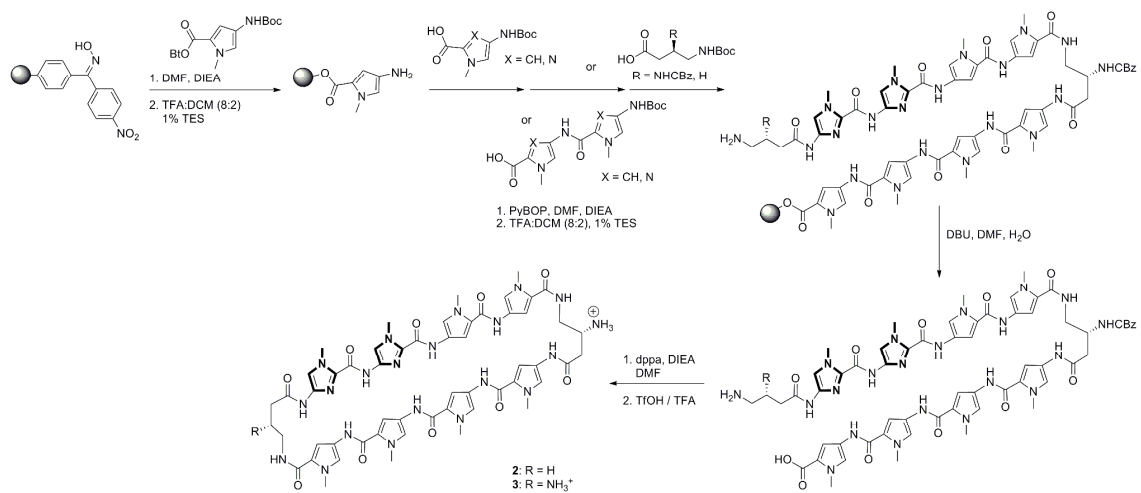

**Figure S1.** Key steps in the synthesis of the macrocyclic polyamides **2** and **3**.

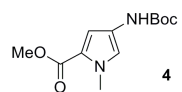

**Figure S2.** Internal standard used for HPLC experiments.

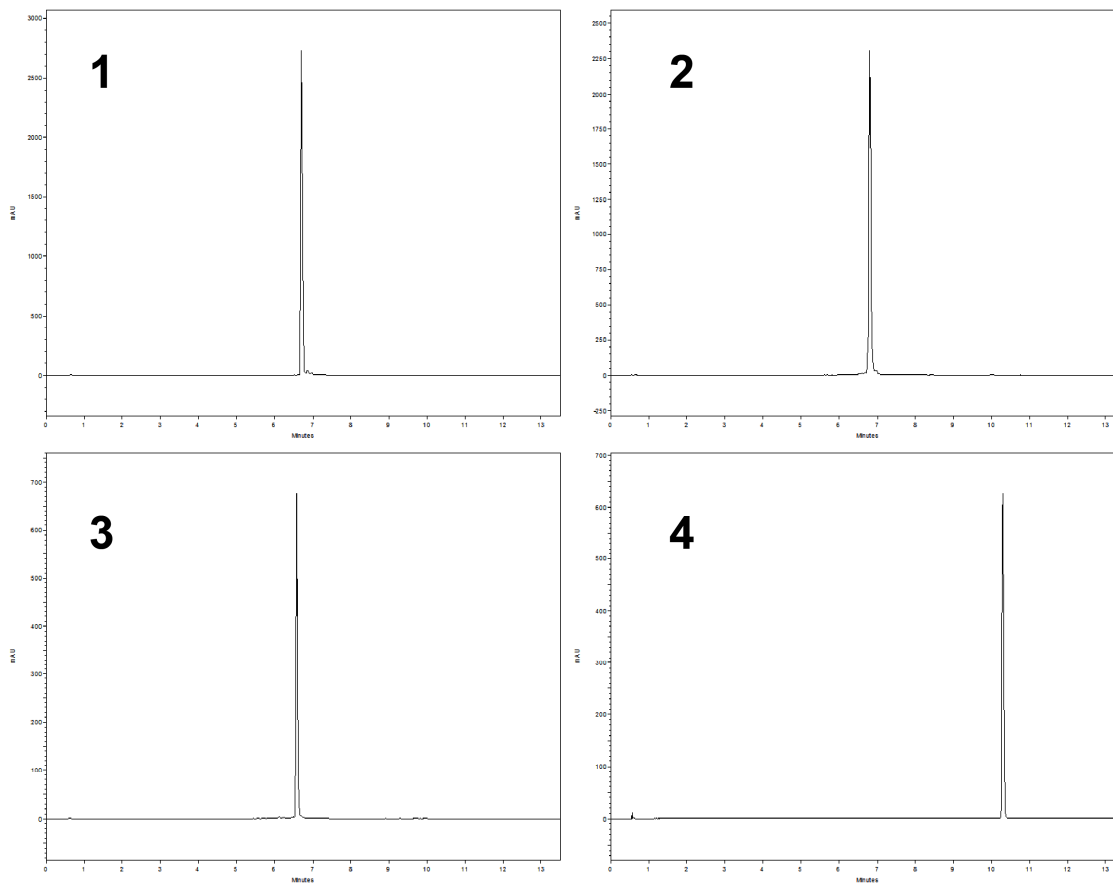

**Figure S3.** HPLC traces of the compounds 1-4.

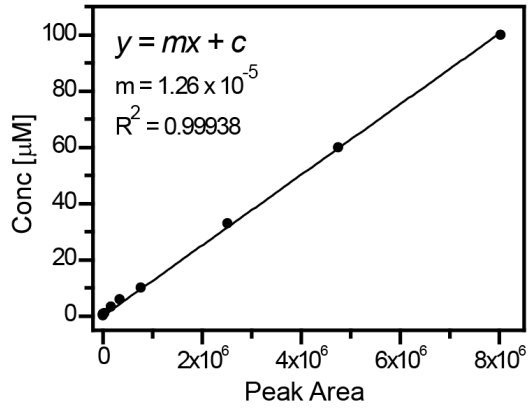

**Figure S4.** Calibration of the analytical HPLC peaks over the range of 0-100 µM **1**. Linear regression was performed using the module implemented in OriginPro 8.

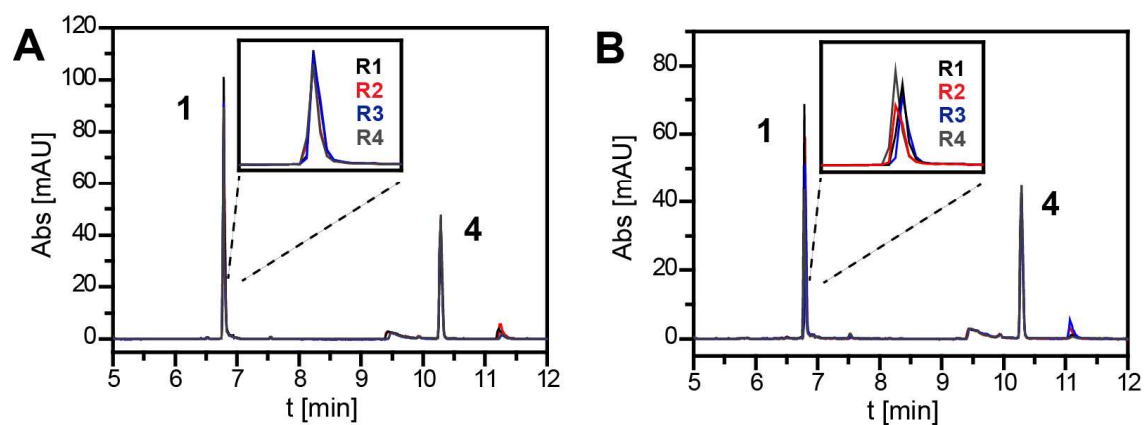

**Figure S5.** Reproducibility of injection (polyamide **1**, 120 nmol / animal). A: IP-injection; B: SC-injection. Blood collected 1.5 h after the injections, with four replicates (R1 - 4) for each injection route.

**Table S1.** Reproducibility of injection (polyamide **1**, 120 nmol / animal). A: IP-injection; B: SC-injection. Blood collected 1.5 h after the injections, with four replicates (R1 - 4) for each injection route.

|                | <b>IP (Area)</b> | <b>SC (Area)</b> |
|----------------|------------------|------------------|
| R1             | 188326           | 110749           |
| R2             | 190669           | 122785           |
| R3             | 162508           | 96690            |
| R4             | 161090           | 93466            |
| <i>Average</i> | <i>175648</i>    | <i>105923</i>    |
| <i>STD</i>     | <i>16131</i>     | <i>13516</i>     |
| <b>% Error</b> | <b>9.2</b>       | <b>12.8</b>      |
